# Supplementary material
Source: Royal Society of Chemistry journal article supplement (doi:10.1039/d6ma00287k)
Supplement: d6ma00287k1.pdf [file d6ma00287k1.pdf]

Supplemental Information for

# Electrochemical Carbon Deposition from CO<sub>2</sub> in Molten Carbonates: Substrate-Dependent Growth

Ivy Wu<sup>a</sup>, Samuel M. Pennell<sup>a</sup>, Haley Hoover<sup>a</sup>, Tolga H. Ulucan<sup>b</sup>, Drew J. Pereria<sup>a</sup>, Demelza Wright<sup>a</sup>, Oluwatamilore Olushina<sup>a</sup>, Nicholas A. Strange<sup>b</sup>, Kerry C. Rippy<sup>a</sup>, Robert T. Bell<sup>a</sup>

---

<sup>a</sup> *National Laboratory of the Rockies, 15013 Denver West Parkway, Golden, CO 80401 USA.*

<sup>b</sup> *SLAC National Accelerator Laboratory, 2575 Sand Hill Rd, Menlo Park, CA 94025*

All high temperature experiments were performed with appropriate heat-resistant gloves, gas ventilation, and standard environmental health & safety protocols.

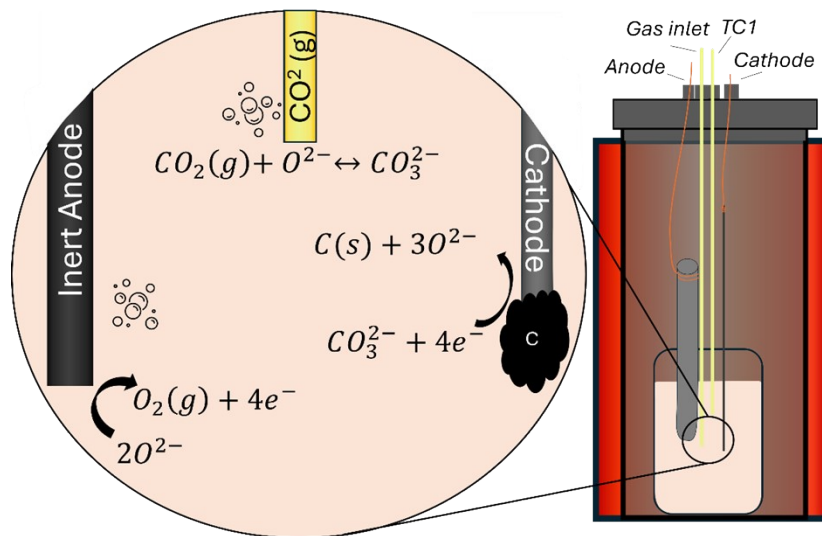

**Supplementary Figure S1.** Schematic of molten salt electrolytic carbon reactor

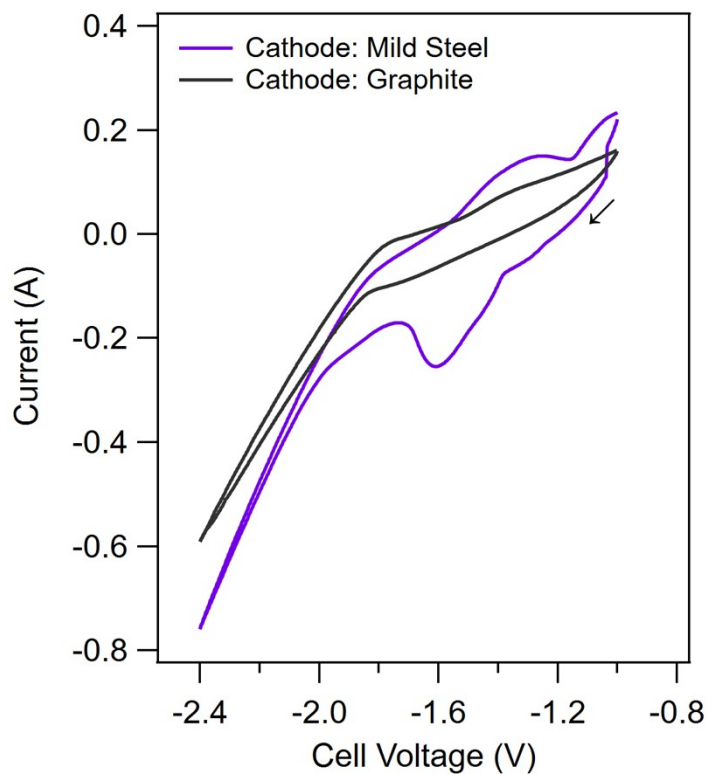

**Supplementary Figure S2.** Cyclic voltammetry at 10 mV/s on mild steel or graphite cathodes after >3 consecutive scans.

**Supplementary Table S1.** ICP Results of deposits on Steel and Graphite

|                          | <b>Steel, ppm</b> | <b>Graphite, ppm</b> |
|--------------------------|-------------------|----------------------|
| <b>Ag</b>                | BELOW LOQ         | BELOW LOQ            |
| <b>Al</b>                | BELOW LOQ         | BELOW LOQ            |
| <b>Ba</b>                | BELOW LOQ         | BELOW LOQ            |
| <b>Cd</b>                | BELOW LOQ         | BELOW LOQ            |
| <b>Co</b>                | BELOW LOQ         | BELOW LOQ            |
| <b>Cr</b>                | BELOW LOQ         | BELOW LOQ            |
| <b>Cu</b>                | BELOW LOQ         | BELOW LOQ            |
| <b>Fe</b>                | <b>64885.48</b>   | BELOW LOQ            |
| <b>Ga</b>                | BELOW LOQ         | BELOW LOQ            |
| <b>K</b>                 | <b>22073.63</b>   | BELOW LOQ            |
| <b>Li</b>                | <b>17682.24</b>   | BELOW LOQ            |
| <b>Mg</b>                | BELOW LOQ         | BELOW LOQ            |
| <b>Mn</b>                | BELOW LOQ         | BELOW LOQ            |
| <b>Na</b>                | BELOW LOQ         | BELOW LOQ            |
| <b>Ni</b>                | BELOW LOQ         | BELOW LOQ            |
| <b>P</b>                 | BELOW LOQ         | BELOW LOQ            |
| <b>Pb</b>                | BELOW LOQ         | BELOW LOQ            |
| <b>Sn</b>                | BELOW LOQ         | BELOW LOQ            |
| <b>Sr</b>                | BELOW LOQ         | BELOW LOQ            |
| <b>Zn</b>                | BELOW LOQ         | BELOW LOQ            |
| <hr/>                    |                   |                      |
| <b>ICP-OES Parameter</b> | <b>Setting</b>    |                      |
| Read time                | 20                |                      |
| RF Power (kw)            | 1.40              |                      |
| Stabilization Time (s)   | 15                |                      |
| Viewing Mode             | Radial            |                      |
| Viewing height (mm)      | 8                 |                      |
| Nebulizer flow (L/min)   | 0.60              |                      |

|                      |                    |
|----------------------|--------------------|
| Plasma flow (L/min)  | 13.0               |
| Aux flow (L/min)     | 1.00               |
| Make-up flow (L/min) | 0.00               |
| Internal Standard    | Yttrium, Tellurium |

The limit of quantification was 8333 ppm or 0.83 wt% for the carbon deposit on steel and 3846 ppm or 0.38 wt% for the carbon deposit on graphite.

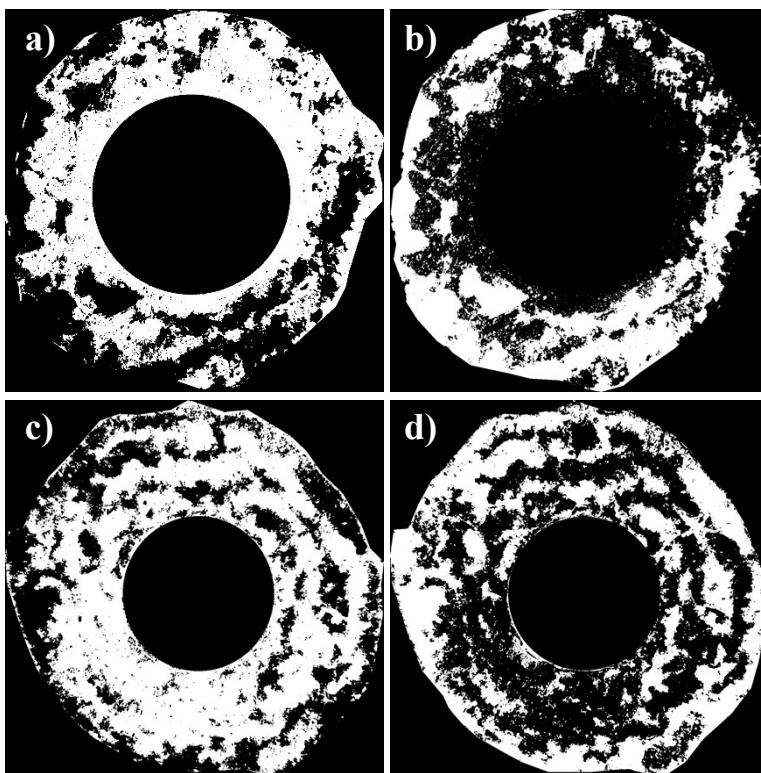

**Supplementary Figure S3.** Thresholding of cross sectional images of a) carbon on graphite b) salt on graphite, c) carbon on steel, d) salt on steel

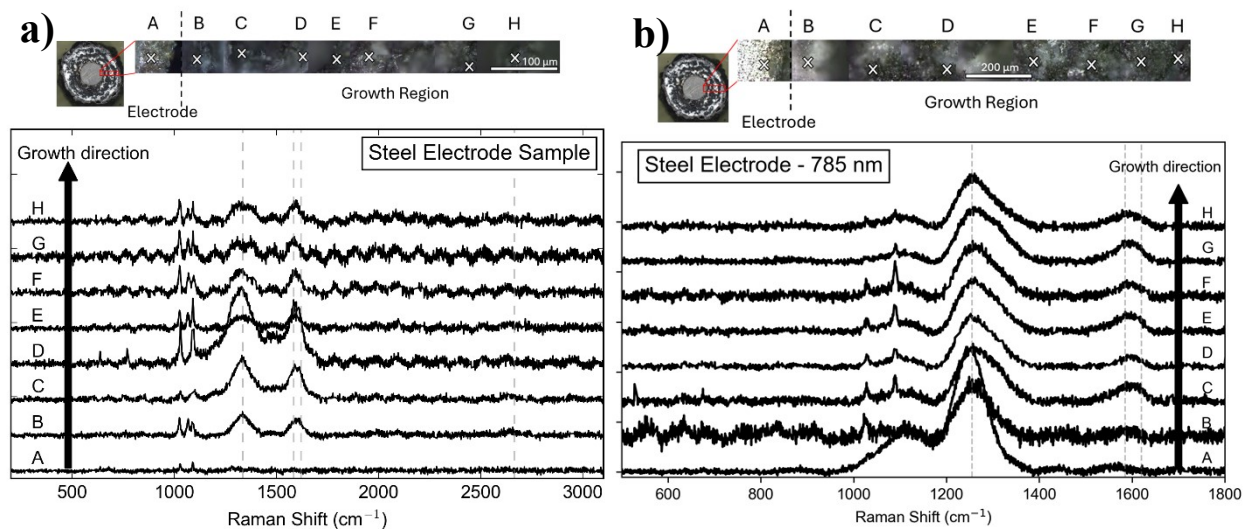

**Supplementary Figure S4.** Raman spectroscopy of carbon deposited on steel at a) 633 nm and b) 785 nm

**Supplementary Table S2.** D/G ratios calculated from Height (H) for deposit grown on graphite and steel

| Position | Graphite D/G, H | Graphite $\chi^2$ | Steel D/G, H | Steel $\chi^2$ |
|----------|-----------------|-------------------|--------------|----------------|
| A        | 1.48            | 0.94              | 1.49         | 0.81           |
| B        | 1.17            | 1.12              | 1.29         | 1.12           |
| C        | 1.59            | 1.09              | 1.25         | 1.15           |
| D        | 1.37            | 1.21              | 1.37         | 1.55           |
| E        | 1.48            | 1.10              | 0.85         | 1.14           |
| F        | 1.26            | 1.07              | 1.05         | 1.44           |
| G        | 1.41            | 1.21              | 0.84         | 1.42           |
| H        | 1.09            | 1.02              | 0.98         | 1.47           |

Raman fits shown below

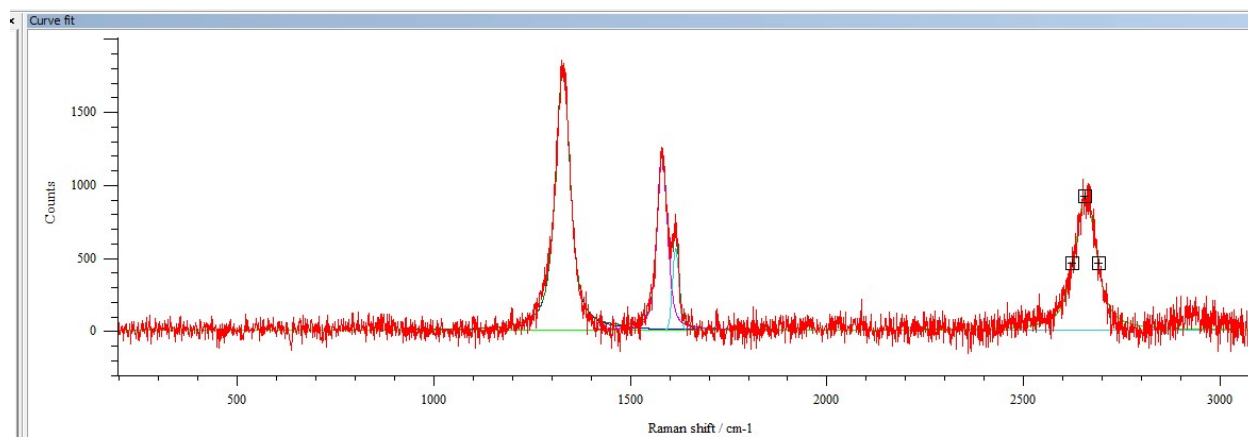

Graphite A

Graphite B

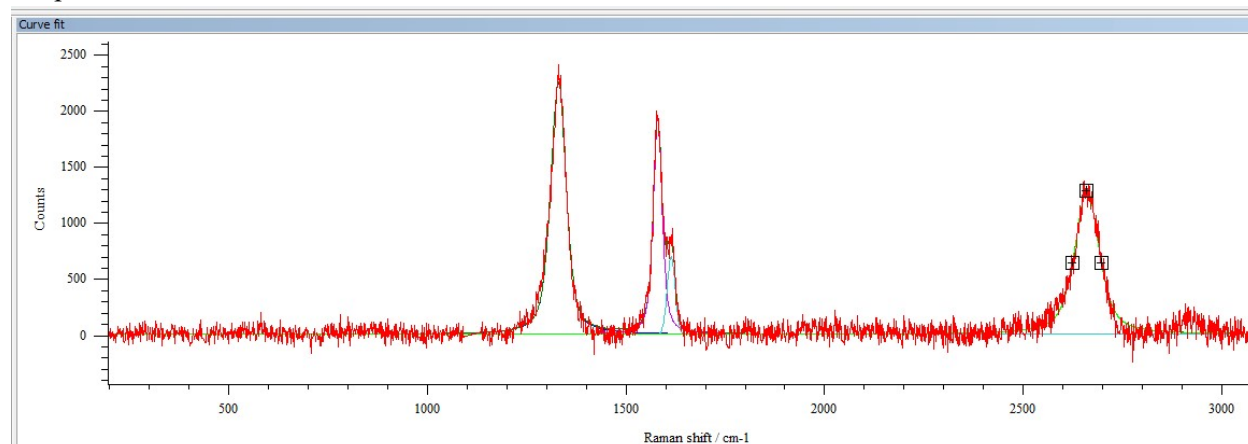

Graphite C

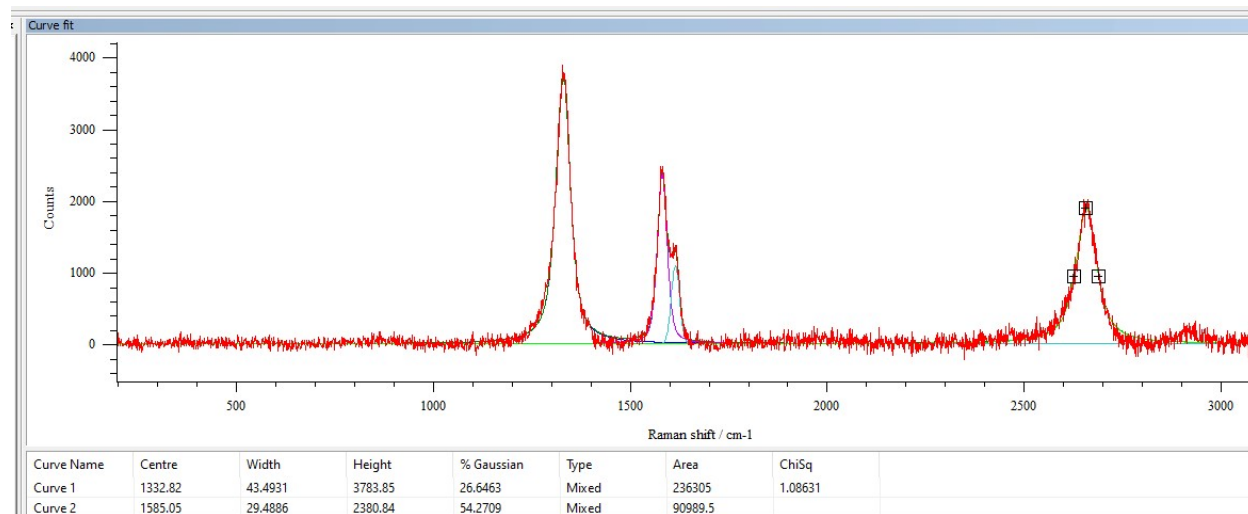

Graphite D

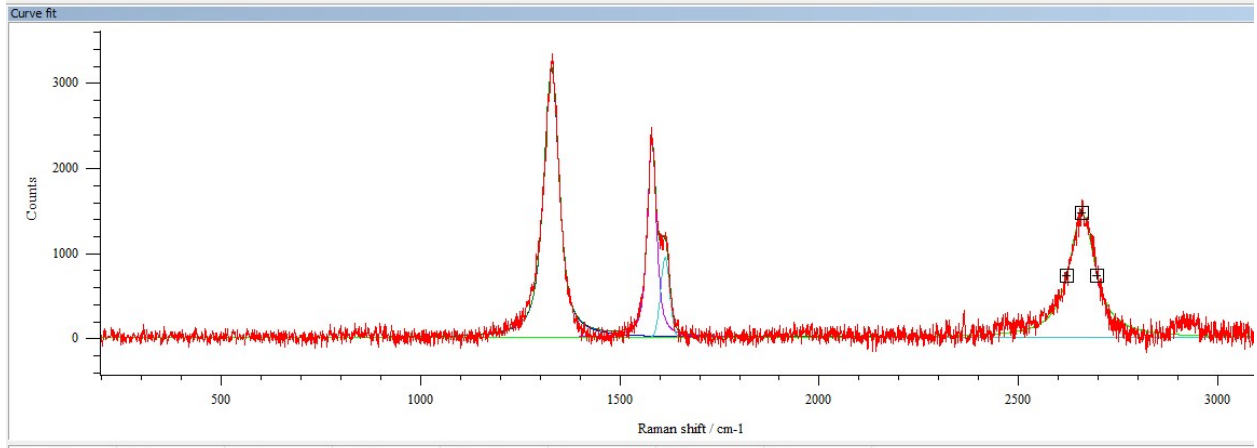

Graphite E

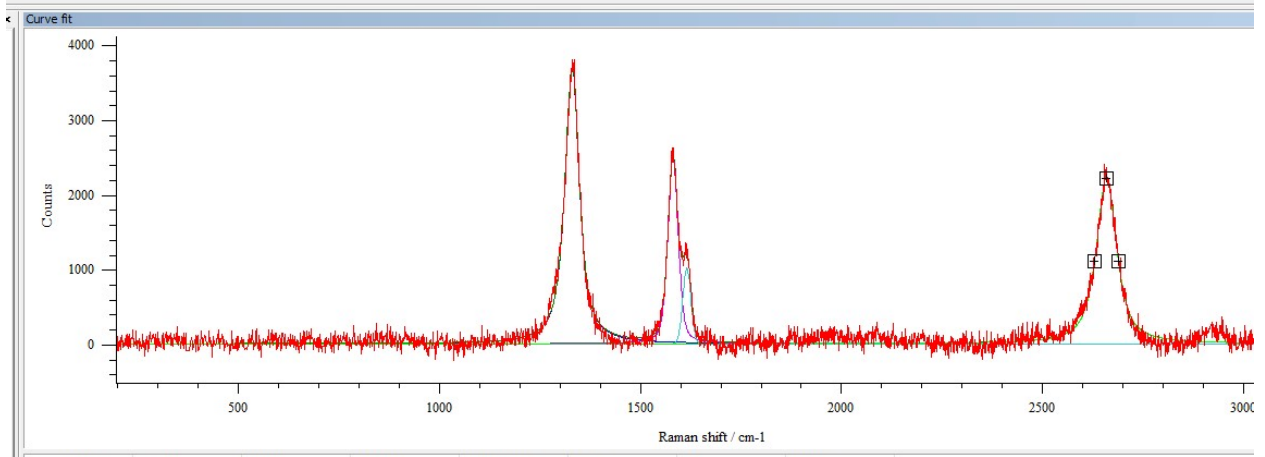

Graphite F

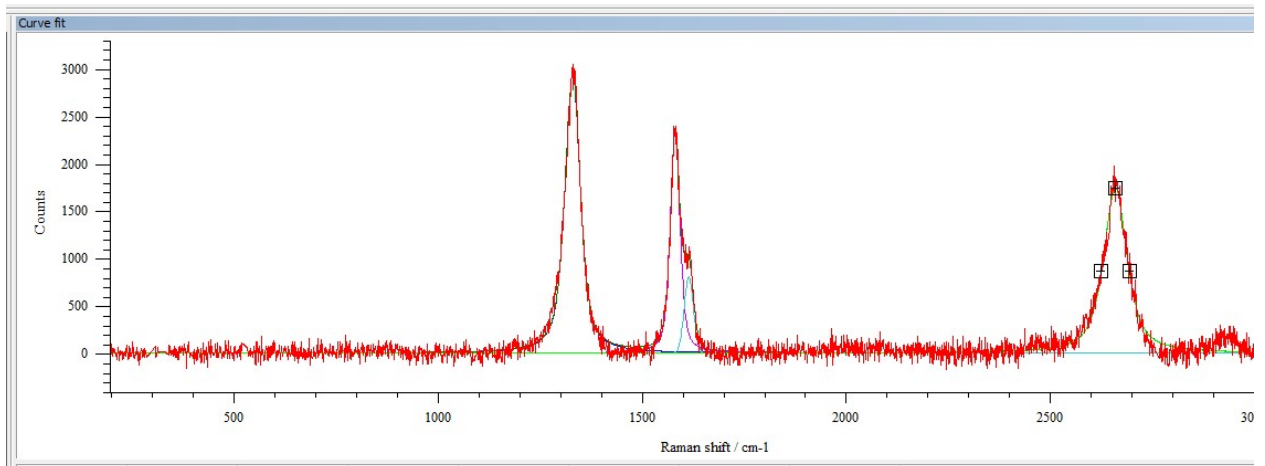

Graphite G

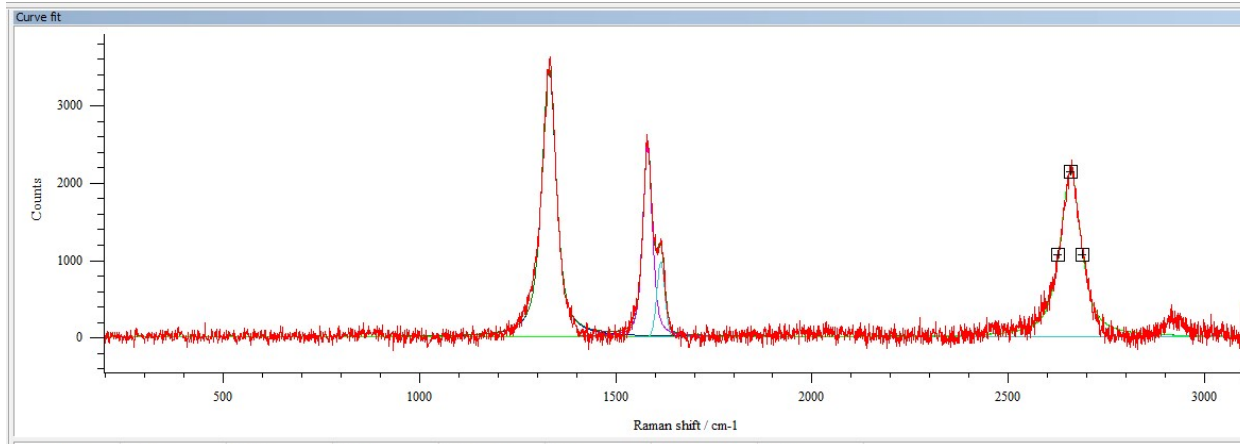

Graphite H

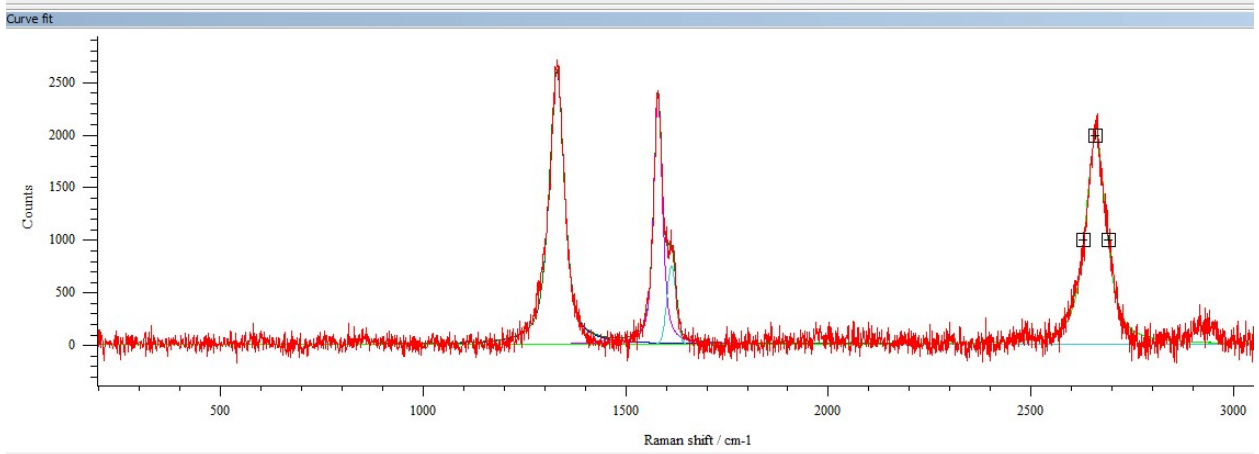

Steel A

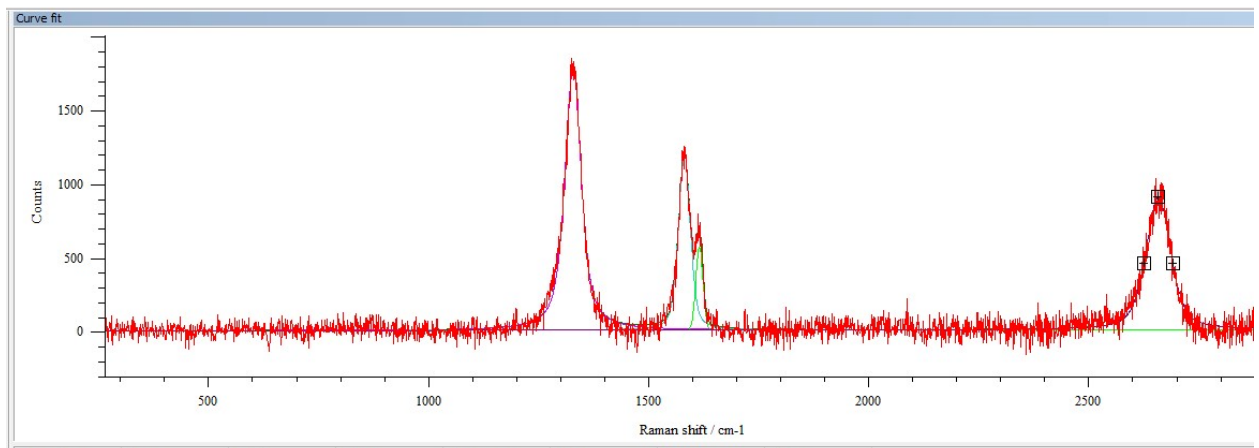

Steel B

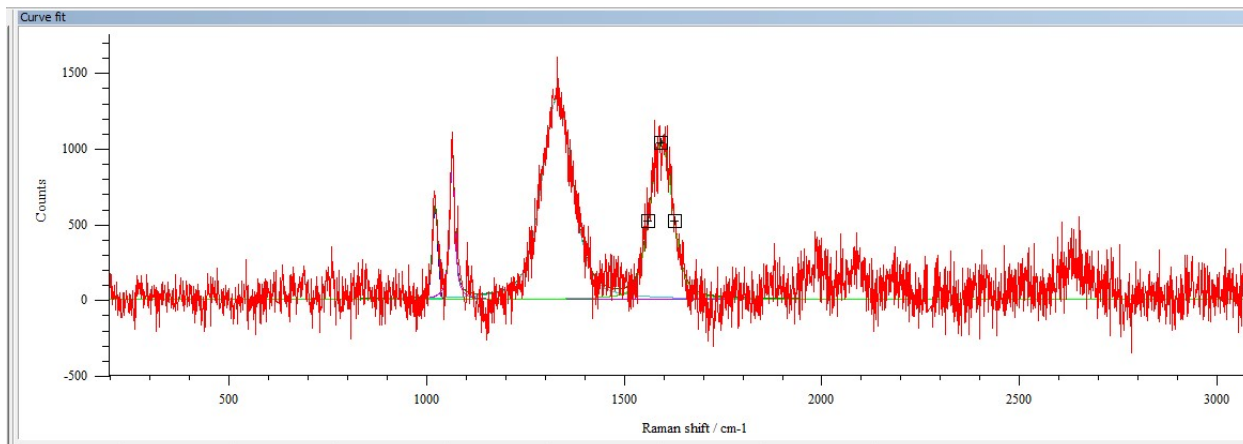

Steel C

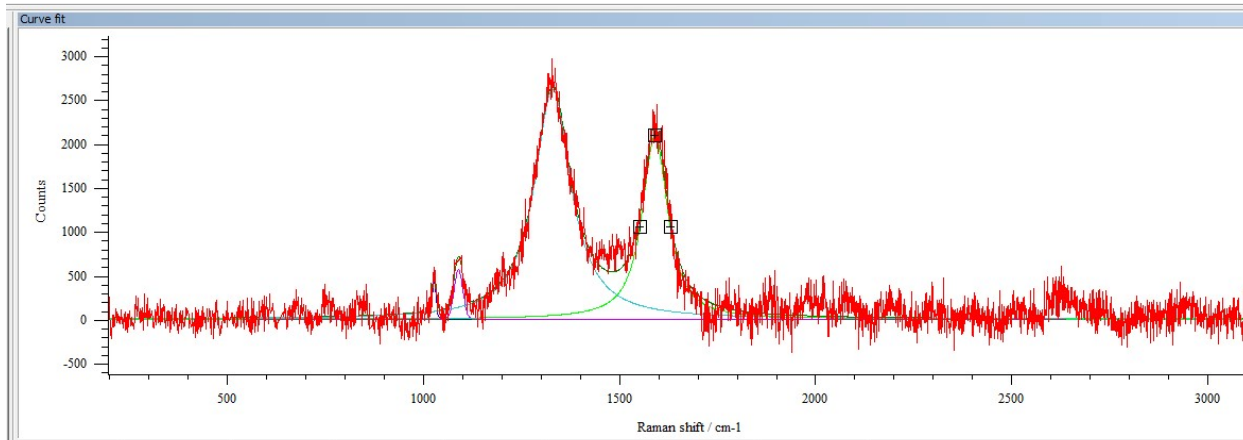

Steel D

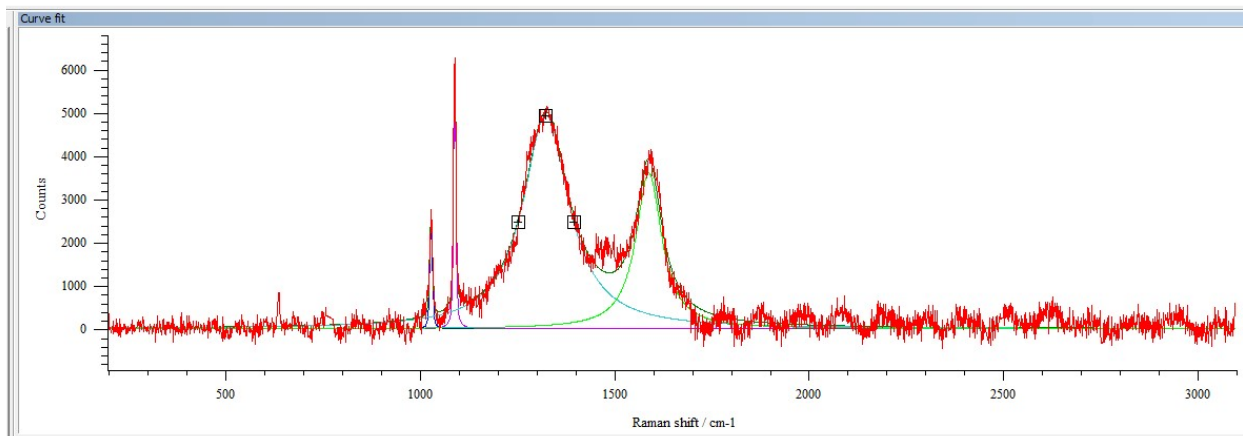

Steel E

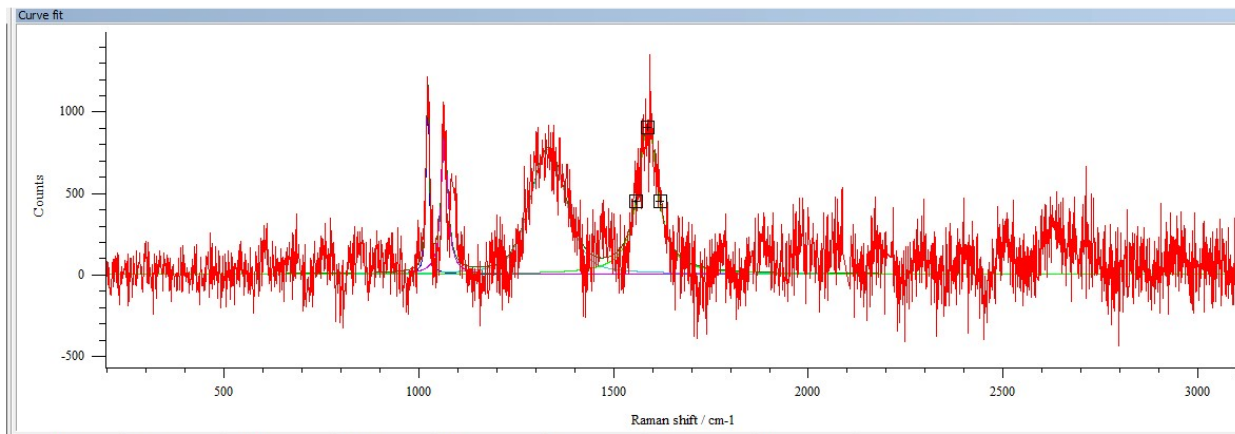

Steel F

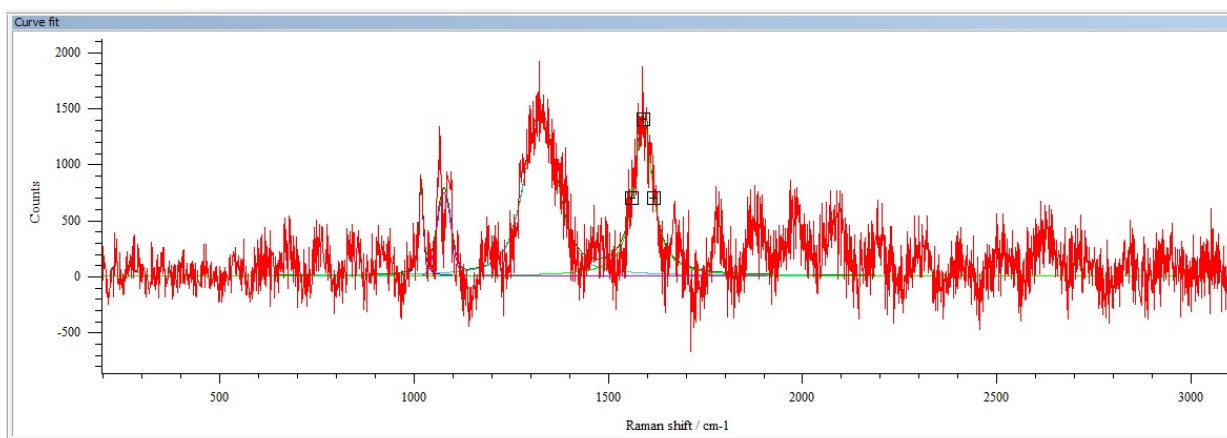

Steel G

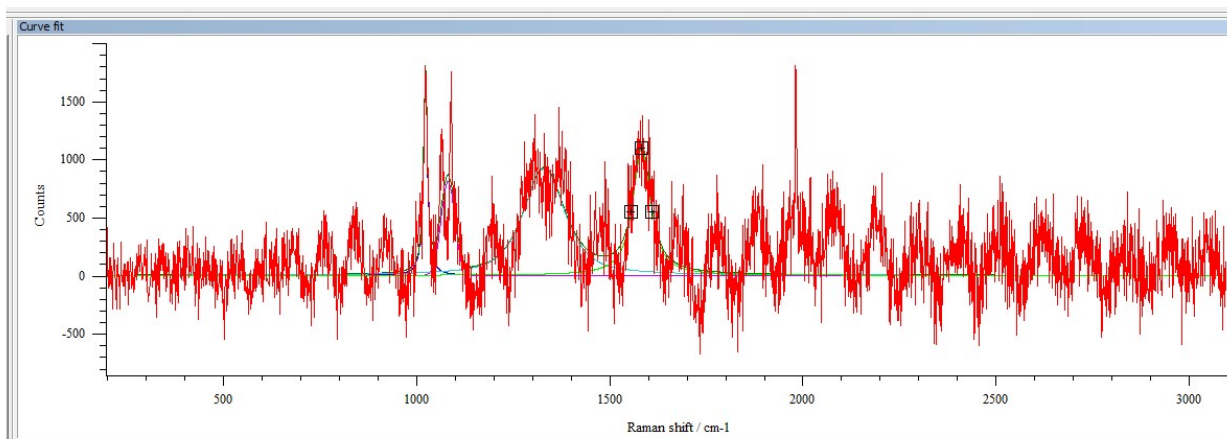

Steel H

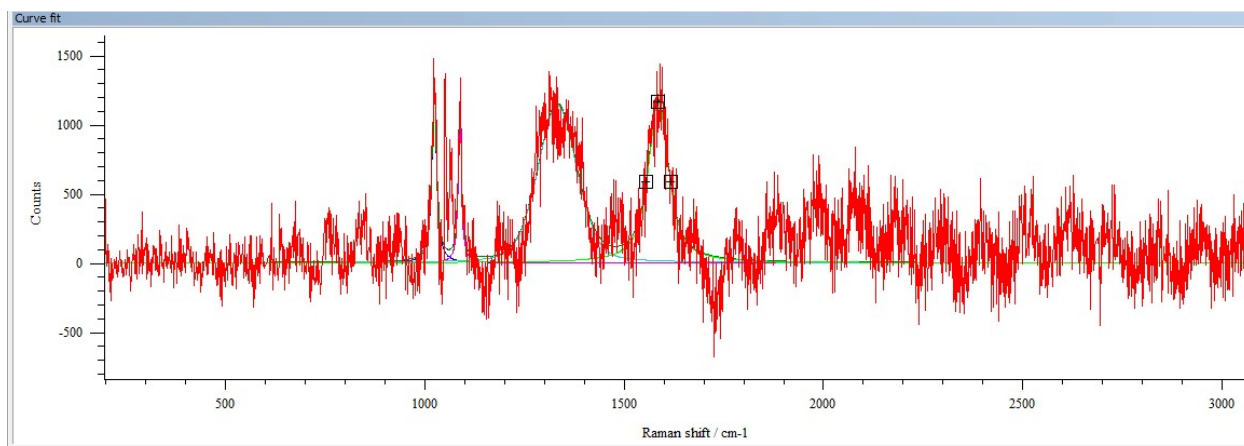

**Supplementary Figure S5.** Raman fits calculated in Renishaw inVia Raman Microscope using mixed Gaussian-Lorentzian fits for each sample point.

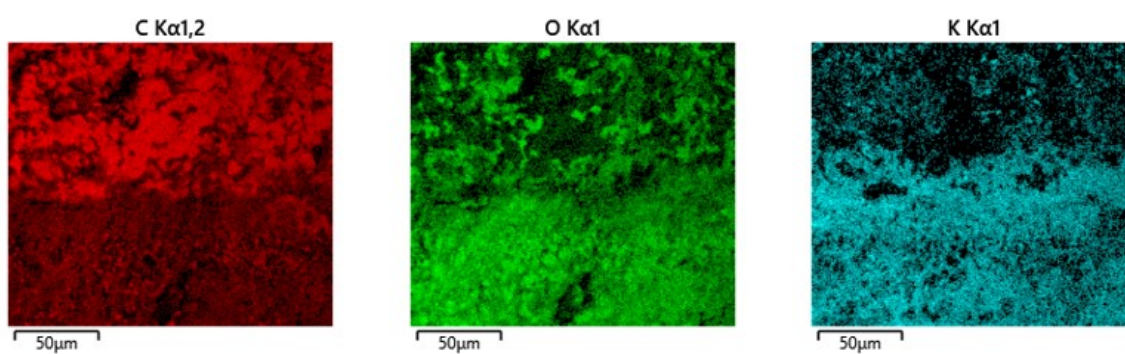

**Supplementary Figure S6.** EDS mapping of graphite cathode after -2.4V chronoamperometry showing the carbon electrode (top) followed by carbon deposit with salt entrapped.

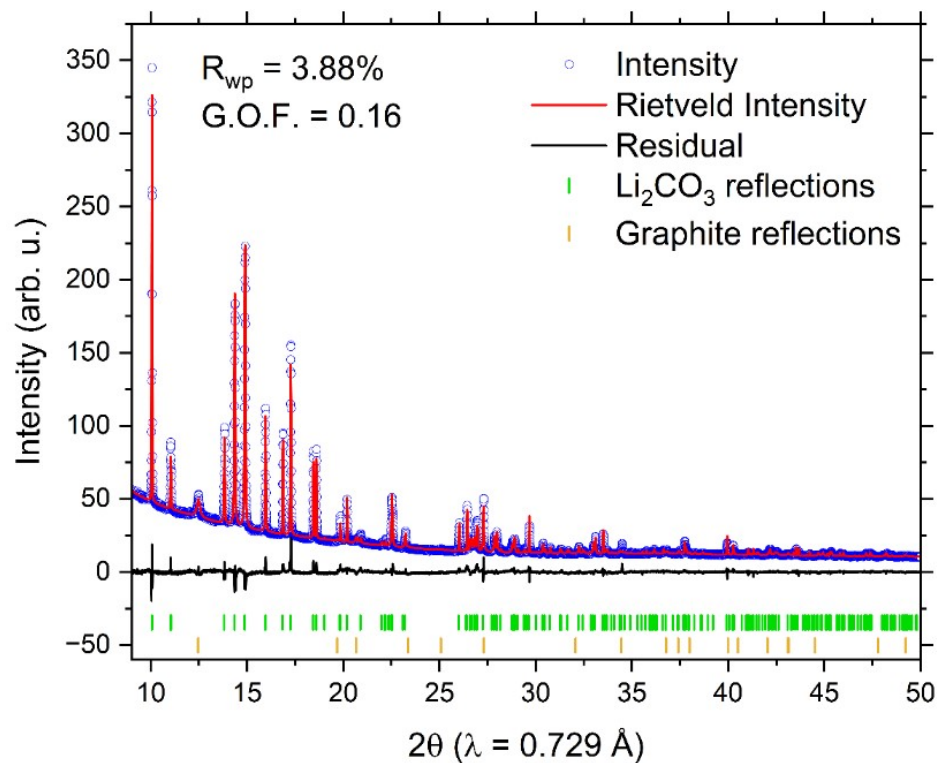

**Supplemental Figure S7.** Rietveld refinement of the steel electrode (unwashed) precipitates after re-measured four months later than initial measurements.  $GOF = R_{wp}/R_{exp} = \sqrt{\chi^2}$ . The  $R_{exp}$  for this dataset is 23.83.

**Supplementary Table S3.** Experimental Details for Rietveld Refinement of the unwashed steel electrode.

|                                 | Lithium Carbonate                                                                    | Graphite                               |
|---------------------------------|--------------------------------------------------------------------------------------|----------------------------------------|
| <b>Crystal data</b>             |                                                                                      |                                        |
| Chemical formula                | Li <sub>2</sub> CO <sub>3</sub>                                                      | C                                      |
| $M_r$                           | 295.56                                                                               | 24.02                                  |
| Crystal system, space group     | <i>C2/c</i>                                                                          | <i>P6<sub>3</sub>/mmc</i>              |
| Temperature (K)                 | 300                                                                                  | 300                                    |
| $a, b, c$ (Å)                   | 8.36933 (5), 4.98190 (2),<br>6.20349 (4)                                             | 2.4639 (4), 2.4639 (4), 6.7250<br>(12) |
| $\alpha, \beta, \gamma$ (°)     | 90, 114.7035 (7), 90                                                                 | 90, 90, 120                            |
| $V$ (Å <sup>3</sup> )           | 234.98 (1)                                                                           | 35.35 (1)                              |
| $Z$                             | 4                                                                                    | 2                                      |
| Radiation type                  | Synchrotron X-ray, $\lambda = 0.729654$ Å                                            |                                        |
| Specimen shape, size (mm)       | Cylinder, 1 × 0.762                                                                  |                                        |
| <b>Data collection</b>          |                                                                                      |                                        |
| Diffractometer                  | SSRL Beamline 2-1                                                                    |                                        |
| Specimen mounting               | Kapton Capillary                                                                     |                                        |
| Data collection mode            | Transmission                                                                         |                                        |
| Scan method                     | Step                                                                                 |                                        |
| $2\theta$ values (°)            | $2\theta_{\min} = 0.35, 2\theta_{\max} = 116.62, 2\theta_{\text{step}} = 0.005$      |                                        |
| <b>Refinement</b>               |                                                                                      |                                        |
| $R$ factors and goodness of fit | $R_p = 0.027, R_{wp} = 0.039, R_{\text{exp}} = 0.238, \chi^2 = 0.027, G.O.F. = 0.16$ |                                        |
| No. of parameters               | 52                                                                                   |                                        |
| No. of restraints               | 0                                                                                    |                                        |

**Supplementary Table S4.** Atomic coordinates for the refined Li<sub>2</sub>CO<sub>3</sub> structure. The input for the Rietveld refinement used the structure defined in ICSD database code 28561.

| Name | Typ<br>e | x        | y        | z        | Site Occupancy | Site Symmetry | U <sub>iso</sub> |
|------|----------|----------|----------|----------|----------------|---------------|------------------|
| Li1  | Li+1     | 0.699(5) | 0.947(6) | 0.837(8) | 1.0000         | 1             | 0.14(3)          |
| C1   | C+0      | 0.5      | 0.567(6) | 0.25     | 1.0000         | 2(y)          | 0.17(3)          |
| O1   | O-2      | 0.5      | 0.822(3) | 0.25     | 1.0000         | 2(y)          | 0.08(2)          |
| O2   | O-2      | 0.150(2) | 0.937(2) | 0.316(3) | 1.0000         | 1             | 0.08(2)          |

**Supplementary Table S5.** Atomic coordinates for the refined C (graphite) structure. The input for the Rietveld refinement used the structure defined in ICSD database code 120118.

| Name | Typ<br>e | x | y | z | Site Occupancy | Site Symmetry | U <sub>iso</sub> |
|------|----------|---|---|---|----------------|---------------|------------------|
|------|----------|---|---|---|----------------|---------------|------------------|

|           |     |     |     |      |        |           |         |
|-----------|-----|-----|-----|------|--------|-----------|---------|
| <b>C1</b> | C+0 | 0   | 0   | 0.25 | 1.0000 | -6m2(100) | 0.01(5) |
| <b>C2</b> | C+0 | 1/3 | 2/3 | 0.25 | 1.0000 | -6m2(100) | 0.01(5) |
